# Supplementary material for: Establishment of the cytoplasmic incompatibility-inducing Wolbachia strain wMel in an important agricultural pest insect
Source: PubMed Central journal article supplement (PMC5159839; doi:10.1038/srep39200), 2016-12-16
Supplement: srep39200-s1.pdf [file srep39200-s1.pdf]

1 **Establishment of the cytoplasmic incompatibility-inducing *Wolbachia***  
2 **strain wMel in an important agricultural pest insect**

3 Xiao-Fei Zhou, Zheng-Xi Li\*

4 Department of Entomology, China Agricultural University, 2 Yuanmingyuan West Road,  
5 Beijing 100193, China

6 \*Author for correspondence: Dr. Zheng-Xi Li, Department of Entomology, China  
7 Agricultural University, 2 Yuanmingyuan West Road, Beijing 100193, China. Tel: +86 10  
8 62732539; Fax: +86 10 62732539; E-mail: zxli@cau.edu.cn.

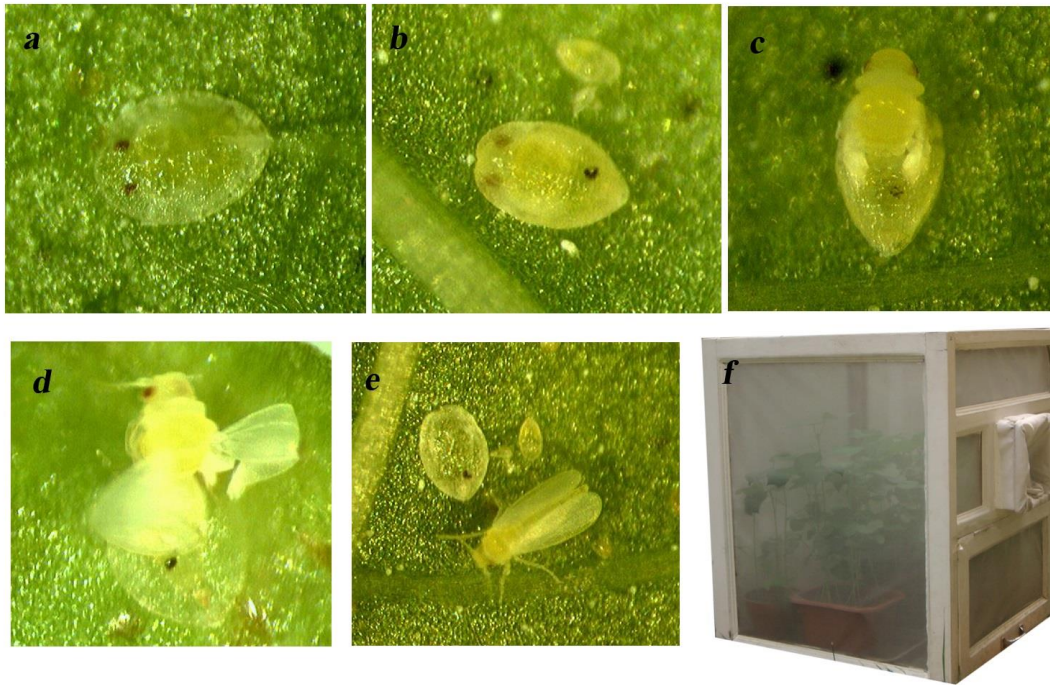

**Supplementary Figure S1.** Microinjection of *wMel* strain and establishment of isofemale lines. a, the 4<sup>th</sup> instar nymph (pseudopupa); b, 24h after injection; c, 48h after injection; d, 72h after injection (eclosion); e, G<sub>0</sub> adult; f, caged population of *wMel*-transfected *B. tabaci*.

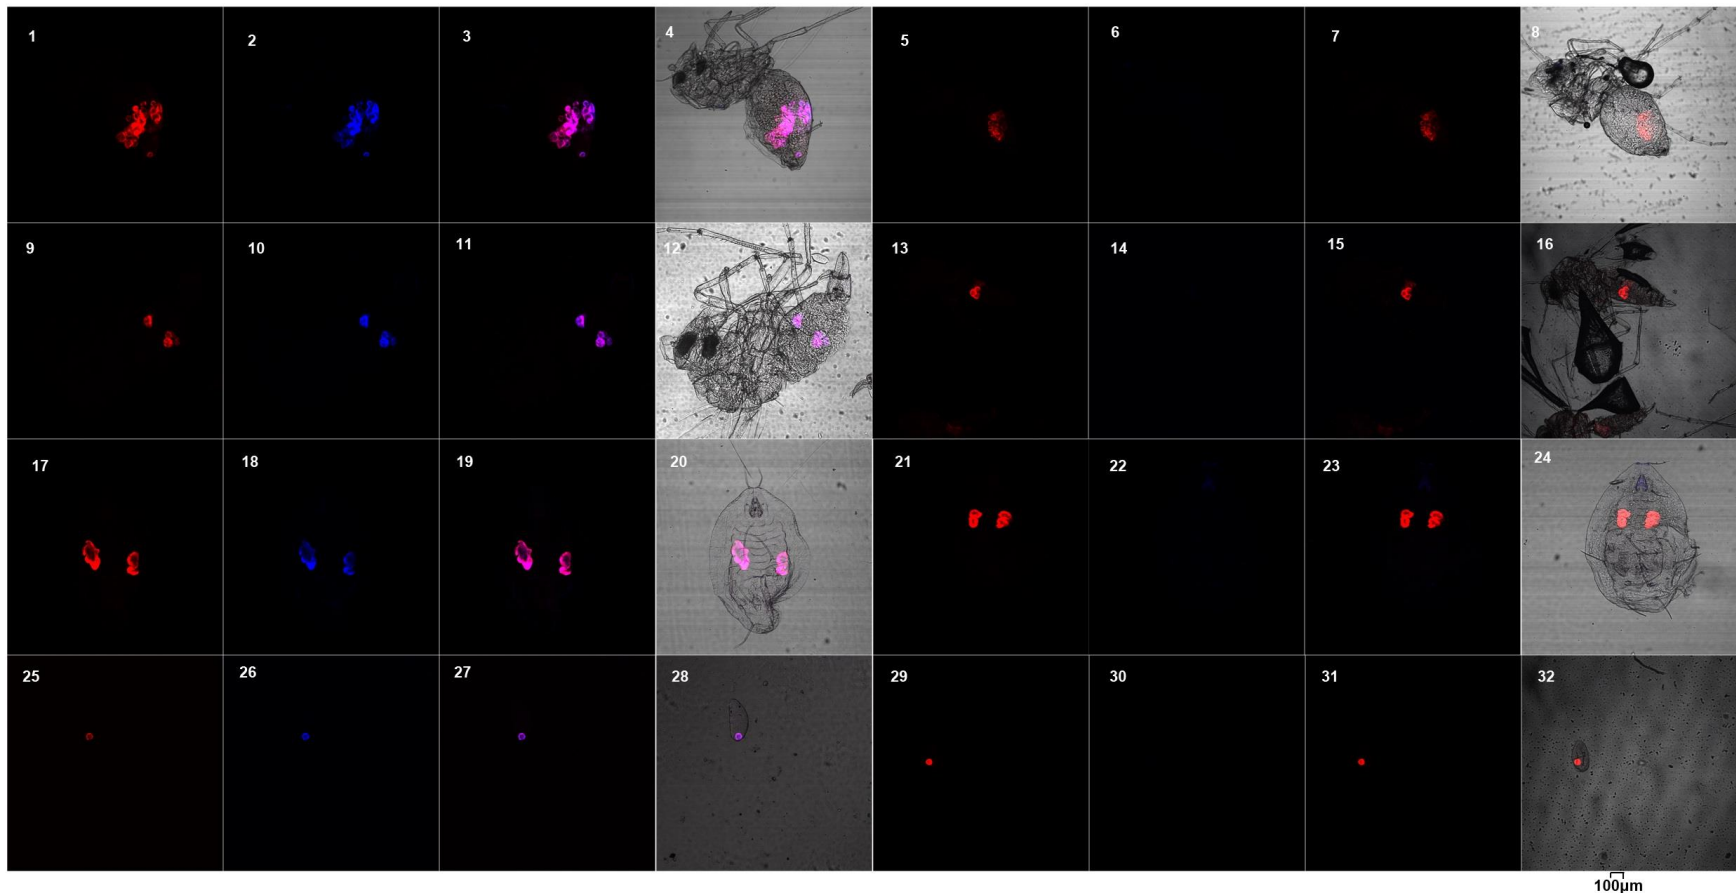

**Supplementary Figure S2.** FISH analysis of *wMel*-transfected and wild-type *B. tabaci* at different developmental stages by using *Portiera*-specific probe (red) and *Wolbachia*-specific probe (blue). 1-4: Transfected female adult; 5-8: Wild-type female adult; 9-12: Transfected male adult; 13-16: Wild-type male adult; 17-20: Transfected nymph; 21-24: Wild-type nymph; 25-28: Transfected egg;

29-32: Wild-type egg. 1, 5, 9, 13, 17, 21, 25 and 29, *Portiera* channel only; 2, 6, 10, 14, 18, 22, 26 and 30, *Wolbachia* channel only; 3, 7, 11, 15, 19, 23, 27 and 31, merged images showing overlap of *Wolbachia* and *Portiera* channels in dark field; 4, 8, 12, 16, 20, 24, 28 and 32, merged images showing overlap of *Wolbachia* and *Portiera* channels in bright field.

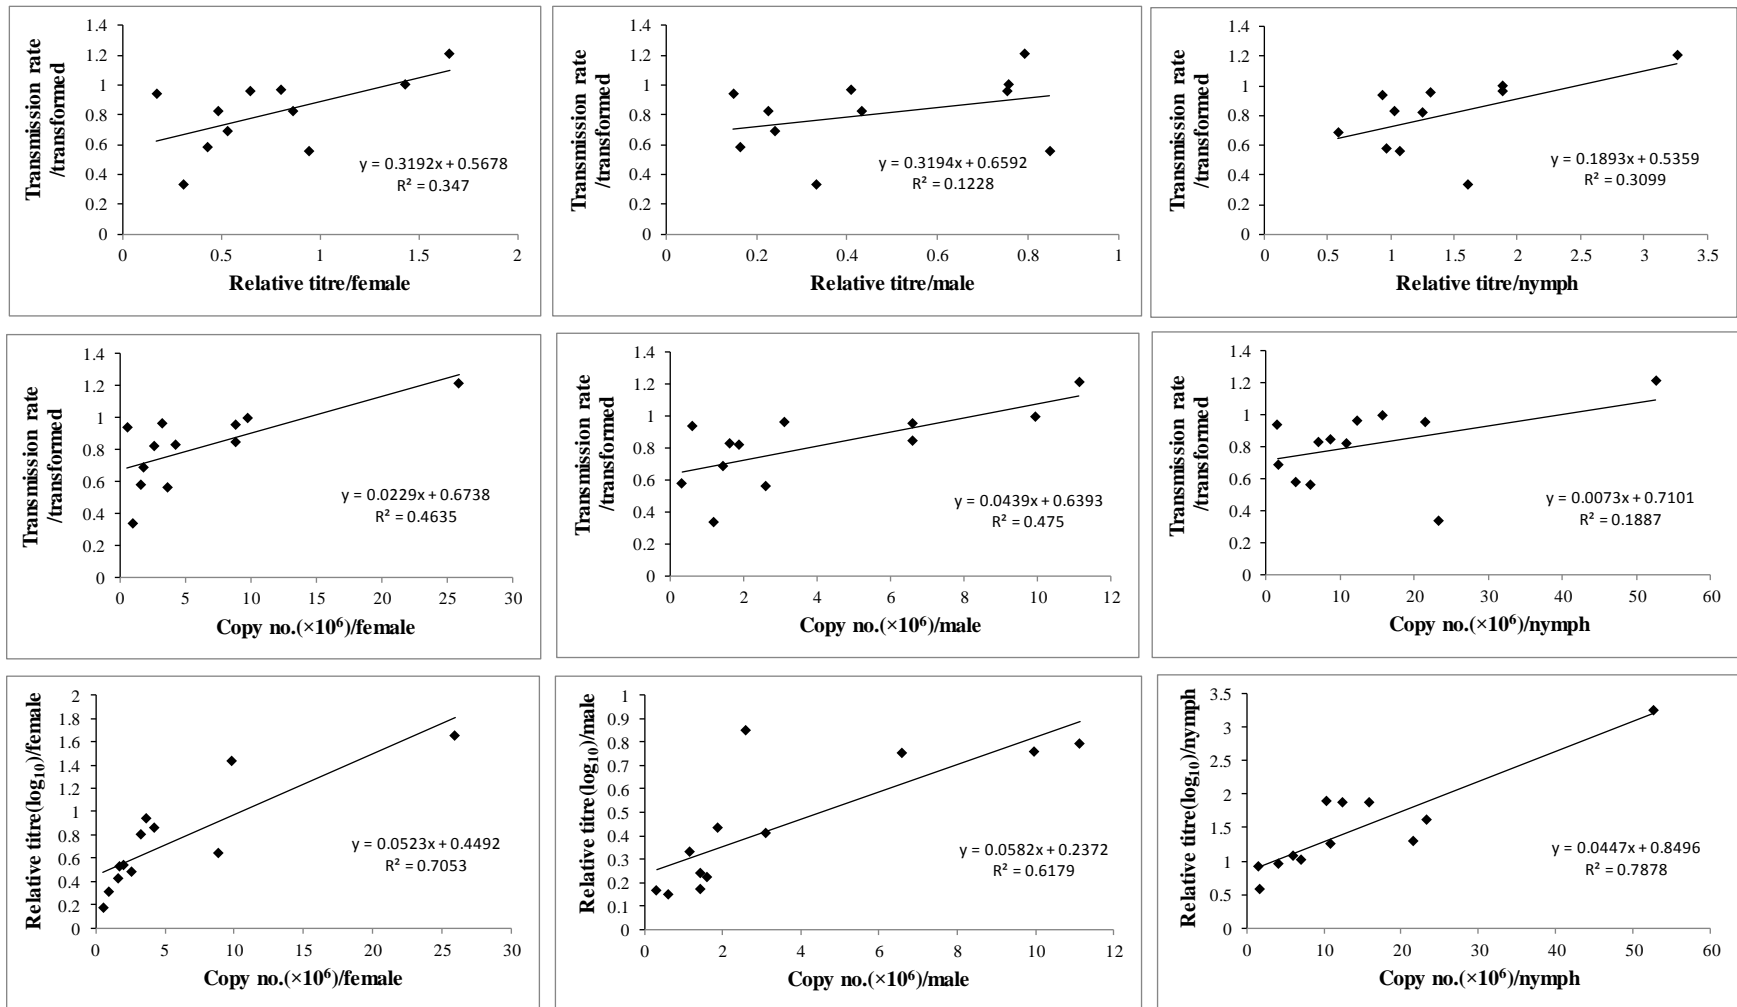

**Supplementary Figure S3.** Linear regression analysis of the correlation between copy number of *wsp* gene, relative titre and transmission rate of *wMel*. Transmission rates (%) are transformed by arcsine square root before analysis. a-c, correlation between

relative titre of *wMel* in female adult (a), male adult (b) and nymph (c) and transmission rate; d-f, correlation between copy number of *wsp* gene of *wMel* in female adult (d), male adult (e) and nymph (f) and transmission rate; g-i, correlation between copy number of *wsp* gene and relative titre of *wMel* in female adult (g), male adult (h) and nymph (i).

**Supplementary Table S1. MLST and *wsp* sequences and PubMLST query results**

| Gene name   | Fragment size (bp) | Allele sequence (5'-->3') <sup>a</sup>                                                                                                                                                                                                                                                                                                                                                                                                                                                                                                                                      | Allelic type <sup>b</sup> |
|-------------|--------------------|-----------------------------------------------------------------------------------------------------------------------------------------------------------------------------------------------------------------------------------------------------------------------------------------------------------------------------------------------------------------------------------------------------------------------------------------------------------------------------------------------------------------------------------------------------------------------------|---------------------------|
| <i>hcpA</i> | 515                | <u>GAAATAGCAGTTGCTGCAAAGCAAGGGCTGCCCGATCCCGAACTCAACCCGCGCCTTCGCTCTGCTATATTTGC</u><br>TGCACGCAAGGAAAATCTACCAAAAAGATAAAAATAGAAACAGCAATAAAAAATGCAACTGGTAACGTTGCTGGAG<br>AAAATTACGAGGAAATCCAATATGAAGGTCATGGGCCTTCTGGCACTGCACCTATTGTCCATGTTTTGACTAAT<br>AATCGCAACCGAACTGCTTCTGAGGTACGTTATATATTTTTCTCGCAAGGGTGGAACTTGGGAGAAACAGGAAG<br>TGTTAGTTACCTTTTCGATCATGTAGGCTTAATCGTCTATAAAGCAGAGGGTGTGAATTTTGATGATTTATTCA<br>GTCATGGAATCGAATTAGAAGTATTGAATGTTGAGGAAAATGACAAAGAAGGATTACACGTTATAACTTGTGAA<br>ATAAAAAGATTTTGGTAAAGTACGCGATGCCTTTTATGCAAAATTCGGAGAACCAGAACTTGCTCAACTTTC       | hcpA:1                    |
| <i>fbpA</i> | 509                | <u>GCTGCTCCGCTTGGCATGATTGAAGCTGGTGTGCAACTTATGCTGGAAATGCTCCCACTTATTTTGAACCTTAA</u><br>TAGTTCCAACCTCTTTACATTCAAAGGATCTAACCTCTGATCAGGCAATAACCTCTTCTGTGAAAGATGCGCTGC<br>GTTTGGGATGCTTAGCTGTGCGGATTTACTATATATCCTGGTTCTGCTAAGTGTTTCGATATGATGGAGGAAGCC<br>CGTGGAATCATAGCTGAAGCCAAATCTTATGGACTTGCAGTAGTGCTATGGTCTTATCCACGCGGTGAAGGGAT<br>TTCCAAAGAAGGTGAAACAGCAGTTGATGTTATTGCCTATGCTGCGCACATGGCAGCTTTGCTTGGCGCTAATA<br>TAATAAAAGTAAAACCTTCCAATAAATATTTGGAAAGGGAGAAAATAGAAACAGAAAATATTGAATCATTATCT<br>AAAAGAATTGAATATGTTAAAAGGTCTTGTTTTGCAGGGAAAAGAATAGTGATTTTCTCTGGCGG              | fbpA:1                    |
| <i>gatB</i> | 471                | <u>GATTTAAACCGTGCAGGGGTTGCTTTAATGGAAATTGTTTTCAGAACCAGATCTCCGTTTCATCTGCGGAAGCTGC</u><br>AGAATGCATGAAAAAATTGAGGCAGATTTTGC GTTACATTGGTTCTGTGATGGTGATATGGAAAAGGGATCAC<br>TTCGTTGTGATGCAAATGTTTTCTGTCCGCCTAAAAGGCAGTAGTACATTTGGCACTCGTTGTGAAATAAAAA<br>ATCTGAACTCGATACGTTATATTGTGCAAGCTATAGACTATGAAATACAAAGACAAATTGAAATTTTAGAAAGT<br>GGAGAAGAAATAAGTCAAGATACCTTATTGTTTGACGTTGCTTCCGGGAAAAACAAAAGTGATGAGAAGCAAAGA<br>GAATGCAAGCGATTATAGATACTTCCCTGAGCCTGATTTATTACCTGTTGAGGTAAGCCAGGATAAAAATTGA<br>TTTAATTCATCATCTTTGCCTGAGTTGCCA                                                  | gatB:1                    |
| <i>ftsZ</i> | 524                | <u>ATTATGGAGCATATAAAGGATAGTCATATGCTTTTCATCACAGCAGGAATGGGCGGTGGTACTGGAACCGGTGC</u><br>AGCACCGTAATTGCAAAAGCAGCCAGAGAAGCAAGAGCCGCAGTTAAGGATAGAGCGCCAAAAGAAAAAAGA<br>TATTGACTGTTGGAGTTGTAACCTAAACCGTTCCGTTTTGAAGGTGTGCGCCGATGCGCATTGCAGAGCTTGGA<br>CTTGAAGAAGTCAAAAATACGTGGATACACTTATTGTCAATCCAAATCAGAATTTATTTAGAATTGCAAATGA<br>AAAAACTACATTTTCTGATGCATTTAACTTGCTGATAATGTTCTGCACATTGGCATCAGAGGAGTAACTGACT<br>TGATGGTCATGCCAGGGCTTATTAATCTTGACTTCGCTGATATAGAAACAGTAATGAGCGAGATGGGCAAAGCG<br>ATGATCGGCACCGGAGAGGCAGAAGGAGAAGATAGAGCAATTAGTGCTGCAGAGGCTGCAATATCCAATCCATT<br>GCTCGA | ftsZ:1                    |

|             |     |                                                                                                                                                                                                                                                                                                                                                                                                                                                                                                                                                                                                                                                                                                                  |                                         |
|-------------|-----|------------------------------------------------------------------------------------------------------------------------------------------------------------------------------------------------------------------------------------------------------------------------------------------------------------------------------------------------------------------------------------------------------------------------------------------------------------------------------------------------------------------------------------------------------------------------------------------------------------------------------------------------------------------------------------------------------------------|-----------------------------------------|
| <i>coxA</i> | 487 | <p>TTGGGGCAATCAACTTTTATAGTTACTATATTTAACATGCGCACAAAAGGAATGTCATTAACATAAGATGCCACTG<br/> TTTGTTTGGTCTGTCTTGCTAACAGCATTATGTTGATTGTTGCCTTACCAGTGCTTGCCGGTGCTATAACTAT<br/> GCTTCTTACTGATCGCAATATTGGTACTTCCTTTTTTGGATCCTGCCGGTGGCGGCATCCTGTGTTATTTCAAC<br/> ATCTATTTTGGTTTTTTGGTCATCCAGAAGTTTACGTAATTATTTTTCCTGCATTTGGCATCATAAGTCAGGTT<br/> GTATCAACTTTTTCTCACAGACCTGTATTTGGTTACATAGGGATGGTTTATGCAATGATAGGTATAGCAGTATT<br/> TGGCTTTATGGTTTTGGGCTCACCATATGTTCACTGTTGGGCTTAGTGCTGACGCTGCTGCATTTTTTAGCACTA<br/> CCACAATTTTTATCGGTGTTATAACTGGCGTCAAAGTCTTTAG</p>                                                                                                                                                             | <i>coxA</i> :1                          |
| <i>wsp</i>  | 595 | <p>TGGTCCAATAAGTGATGAAGAACTAGCTACTACGTTTCGTTTTGCAATACAACGGTGAATTTTTACCTCTTTTCA<br/> CAAAAAGTTGATGGTATTACCTATAAAGAAAGACAAGAGTGATTACAGTCCATTAAAACCATCTTTTATAGCTGGT<br/> GGTGGTGCATTTGGTTACAAAATGGACGACATCAGGGTTGATGTTGAAGGAGTTTATTCATACCTAAACAAAA<br/> TGATGTTAAAGATGTAACATTTGACCCAGCAAATACTATTGCAGACAGTGTAACAGCAATTTAGGATTAGTGA<br/> ACGTGTATTACGATATAGCAATTGAAGATATGCCTATCACTCCATACATTGGTGTGGTGTGGTGCAGCGTAT<br/> ATTAGCACTCCTTTGGAACCCGCTGTGAATGATCAAAAAAGTAAATTTGGTTTTGCTGGTCAAGTAAAAGCTGG<br/> TGTTAGTTATGATGTAACCTCCAGAAGTCAAACCTTTATGCTGGAGCTCGTTATTTCCGGTCTTATGGTGCTAATT<br/> TTGATGGAAAAAACAAGATCCTAAAAATCAACCGGACAGGCTGCTGATGCAGGCGCATACAAAGTTCCTTTAC<br/> AGCASTGTTGGTGCAGAAGCTGGAGTAGCGTTTAAATTTTT</p> | HVR1:1<br>HVR2:12<br>HVR3:21<br>HVR4:24 |

<sup>a</sup> The underlined bases are sequences of sense and antisense primers.

<sup>b</sup> The allelic profile for *gatB*:1, *coxA*:1, *hcpA*:1, *ftsZ*:1 and *fbpA*:1 is corresponding to ST-1; the HVR profile for HVR1:1, HVR2:12, HVR3:21 and HVR4:24 is corresponding to ST-31.
